# Supplementary material
Source: MDPI journal article supplement (https://www.mdpi.com/2072-4292/14/12/2739)
Supplement: s1 [file s1]

# Relative merits recognition of nine mainstream satellite-based soil moisture products at the global scale

**Table S1** List of soil moisture evaluation sites at the global scale adopted in this study.

| Network           | Country | Continent                                             | Station Number | Depth used (cm) | References/links                                                          |
|-------------------|---------|-------------------------------------------------------|----------------|-----------------|---------------------------------------------------------------------------|
| North America     | USA     | North America                                         | 35             | 2.5-10          | Cook, 2016                                                                |
| BNZ-LTER          | Alaska  |                                                       | 12             | 5-10            | <a href="http://www.lter.uaf.edu/">http://www.lter.uaf.edu/</a>           |
| FLUXNET-AMERIFLUX | USA     |                                                       | 8              | 0-10            | <a href="http://ameriflux.lbl.gov/">http://ameriflux.lbl.gov/</a>         |
| SCAN              | USA     |                                                       | 239            | 5-10            | Schaefer et al., 2007                                                     |
| SNOTEL            | USA     |                                                       | 441            | 5-10            | Leavesley et al., 2008                                                    |
| SOILSCAPE         | USA     |                                                       | 171            | 4-10            | Moghaddam et al., 2010                                                    |
| USCRN             | USA     |                                                       | 115            | 5-10            | Bell et al., 2013                                                         |
| RISMA             | USA     |                                                       | 25             | 0-10            | Ojo et al., 2015                                                          |
| COSMOS            | USA     | North America/Europe /South America/Africa/ Australia | 109            | 0-10            | Zreda et al., 2008                                                        |
| PBO_H2O           | USA     | North America/South America/Africa                    | 159            | 0-5             | Kristine et al., 2008                                                     |
| BIEBRZA_S-1       | Poland  | Europe                                                | 30             | 5-10            | Musial et al., 2016                                                       |
| FR_Aqui           | France  |                                                       | 5              | 1-10            | Wigneron et al., 2018                                                     |
| HOBE              | Denmark |                                                       | 32             | 0-5             | Bircher et al., 2012                                                      |
| REMEDHUS          | Spain   |                                                       | 24             | 0-5             | Gonzalez-Zamora et al., (2018)                                            |
| RSMN              | Romania |                                                       | 20             | 0-5             | <a href="http://assimo.meteoromania.ro">http://assimo.meteoromania.ro</a> |
| SMOSMANIA         | France  |                                                       | 23             | 5-10            | Calvet et al., 2016                                                       |
| TERENO            | Germany |                                                       | 5              | 5               | Zacharias et al., 2011                                                    |
| CTP_SMTMN         | China   | Asia                                                  | 57             | 0-10            | Yang et al., 2013                                                         |

|         |           |               |    |      |                     |
|---------|-----------|---------------|----|------|---------------------|
| LAB-net | Chile     | South America | 4  | 7-10 | Mattar et al., 2016 |
| OZNET   | Australia | Australia     | 38 | 0-8  | Smith et al., 2012  |

**Table S2** The IGBP land cover classification.

| Subclass                            | IGBP legend | Acronym | Class       |
|-------------------------------------|-------------|---------|-------------|
| Evergreen Needleleaf Forests        | 1           | ENF     | Forest      |
| Evergreen Broadleaf Forests         | 2           | EBF     |             |
| Deciduous Needleleaf Forests        | 3           | DNF     |             |
| Deciduous Broadleaf Forests         | 4           | DBF     |             |
| Mixed Forests                       | 5           | MF      |             |
| Closed Shrublands                   | 6           | CS      | Shrublands  |
| Open Shrublands                     | 7           | OS      |             |
| Woody Savannas                      | 8           | WS      | Woodlands   |
| Savannas                            | 9           | SA      |             |
| Grasslands                          | 10          | GR      | Grasslands  |
| Permanent Wetlands                  | 11          | PW      | /           |
| Croplands                           | 12          | CR      | Croplands   |
| Cropland/Natural Vegetation Mosaics | 14          | CNVM    |             |
| Urban and Built-up Lands            | 13          | UBL     | Unvegetated |
| Permanent Snow and Ice              | 15          | PSI     |             |
| Barren                              | 16          | BA      |             |
| Water Bodies                        | 0           | WB      | /           |
| Unclassified                        | 255         | UC      | /           |

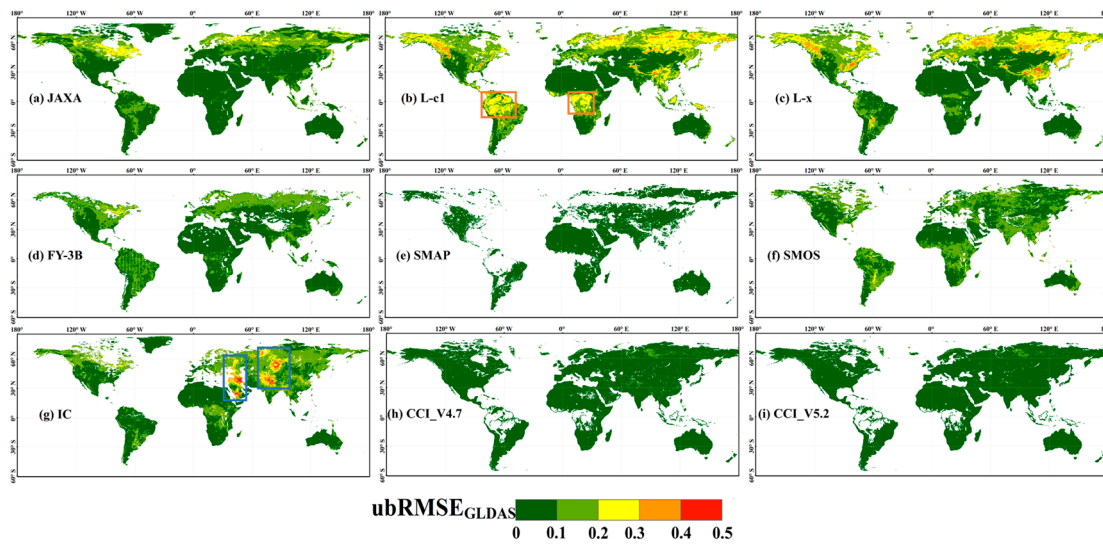

**Fig. S1.** Spatial distribution of ubRMSE ( $\text{m}^3/\text{m}^3$ ) against GLDAS for each product. The regions with distinct spatial patterns were outlined with orange boxes for Lc1 and blue boxes for IC.

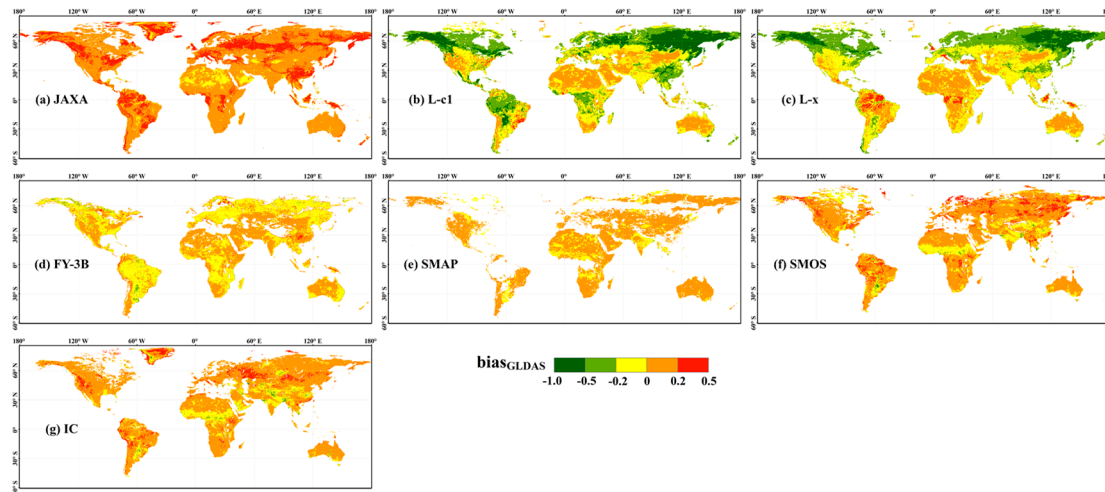

**Fig. S2.** Same as Fig. S1, but for bias ( $\text{m}^3/\text{m}^3$ ).

## References Supplementary

- Bell, J. E., Palecki, M.A., Baker, C.B., Collins, W.G., Lawrimore, J.H., Leeper, R.D., Hall, M.E., Kochendorfer, J., Meyers, T.P., Wilson, T., Diamond, H.J., 2013. U.S. Climate Reference Network soil moisture and temperature observations. *J. Hydrometeorol.*, 14, 977-988.
- Bircher, S., Skou, N., Jensen, K., Walker, J., Rasmussen, L., 2012. A soil moisture and temperature network for smos validation in western Denmark. *Hydrol. Earth Syst. Sci.* 16.
- Calvet, J.-C., Fritz, N., Berne, C., Pignatelli, B., Maurel, W., Meurey, C., 2016. Deriving pedotransfer functions for soil quartz fraction in southern France from reverse modelling. *SOIL*, 2(4), 615–629.
- Cook, D. R., 2016. Soil temperature and moisture profile (stamp) system handbook, Technical report, DOE Office of Science Atmospheric Radiation Measurement (ARM) Program.
- Gonzalez-Zamora, A., Sanchez, N., Pablos, M., Martinez-Fernandez, J., 2018. Cci soil moisture assessment with smos soil moisture and in situ data under different environmental conditions and spatial scales in Spain. *Remote Sens. Environ.* 225.
- Kristine M.L., Eric E.S., Ethan D.G., Andria L.B., John J.B., Valery U.Z., 2008. Use of GPS receivers as a soil moisture network for water cycle studies. *Geophys. Res. Lett.*, 35, L24405.
- Leavesley, G. H., David, O., Garen, D. C., Lea, J., Strobel, M. L., 2008. A Modeling Framework for Improved Agricultural Water Supply Forecasting. AGU Fall Meeting Abstracts.
- Mattar, C., Santamaria-Artigas, A., Duran-Alarcon, C., Olivera-Guerra, L., Fuster, R., Borvar'an, D., 2016). The lab-net soil moisture network: Application to thermal remote sensing and surface energy balance. *Data*, 1(1).
- Moghaddam, M., Entekhabi, D., Goykhman, Y., Li, K., Liu, M., Mahajan, A., Nayyar, A., Shuman, D., Teneketzis, D., 2010. A wireless soil moisture smart sensor web using physics-based optimal control: concept and initial demonstration. *IEEE-JSTARS*. 4(3), 522-535.
- Musial, J. P., Dabrowska-Zielinska, K., Kiryla, W., Oleszczuk, R., Gnatowski, T., Jaszczynski, J., 2016. Derivation and validation of the high resolution satellite soil moisture products: a case study of the biebza sentinel-1 validation sites, *Geoinformation*. 1 (8), 37–53.
- Ojo, E. R., Bullock, P. R., L'Heureux, J., Powers, J., McNairn, H., Pacheco, A., 2015. Calibration and evaluation of a frequency domain reflectometry sensor for real-time soil moisture monitoring.

Vadose Zone Journal, 14(3).

- Schaefer, G.L., Cosh, M.H., Jackson, T.J., 2007. The USDA natural resources conservation service soil climate analysis network (SCAN). *J. Atmos. Ocean. Technol.* 46(12), 2073.
- Smith, A. B., Walker, J.P., Western, A.W., Young, R.I., Ellett, K.M., Pipunic, R.C., Grayson, R.B., Siriwardena, L., Chiew, F.H.S., Richter, H., 2012. The Murrumbidgee soil moisture monitoring network data set. *Water Resour. Res.*, 48.
- Wigneron, J.-P., Dayan, S., Kruszewski, A., Aluome, C., Al-Yaari, A., Fan, L., Guven, S., Chipeaux, C., Moisy, C., Guyon, D., Loustau, D., 2018. The aqui network: Soil moisture sites in the “les landes” forest and graves vineyards (bordeaux aquitaine region, france), 3739–3742.
- Yang, K., Qin, J., Zhao, L., Chen, Y. Y., Tang, W. J., Han, M. L., La, Z., Chen, Z. Q., Lv, N., Ding, B. H., Wu, H., Lin, C. G., 2013. A multiscale soil moisture and freeze-thaw monitoring network on the third pole. *Bull. Amer. Meteorol. Soc.*, 94(12), 1907-1916.
- Zreda M., Desilets D., Ferré Ty P.A., Scott R.L., 2008. Measuring soil moisture content non-invasively at intermediate spatial scale using cosmic-ray neutrons. *Geophys. Res. Lett.*, 35(21).
- Zacharias, S., Bogen, H.R., Samaniego, L., Mauder, M., Fuß, R., Pütz, T., Frenzel, M., Schwank, M., Baessler, C., Butterbach-Bahl, K., Bens, O., Borg, E., Brauer, A., Dietrich, P., Hajnsek, I., Helle, G., Kiese, R., Kunstmann, H., Klotz, S., Munch, J.C., Papen, H., Priesack, E., Schmid, H.P., Steinbrecher, R., Rosenbaum, U., Teutsch, G., Vereecken, H., 2011. A Network of Terrestrial Environmental Observatories in Germany. *Vadose Zone J.*, 10. 955–973.
